# Supplementary material for: The development of anthracene derivatives for organic light-emitting diodes
Source: Royal Society of Chemistry journal article supplement (doi:10.1039/c2jm16855c), 2012-01-01
Supplement: c2jm16855c.pdf [file c2jm16855c.pdf]

## Supporting Information

### The development of anthracene derivatives for organic light-emitting diodes

Jinhai Huang, Jian-Hua Su and He Tian\*

Key Laboratory for Advanced Materials and Institute of Fine Chemicals, East China University of Science & Technology, Shanghai 200237, P. R. China.  
E-mail: [tianhe@ecust.edu.cn](mailto:tianhe@ecust.edu.cn). Tel.: +086-21-64252756; fax: 086-21-64252288;

**Table 1.** The photophysical and thermal property data for compounds referred in the Feature article.

| compounds | $\lambda$<br>(nm) <sup>a</sup> | T <sub>d</sub><br>(°C) <sup>§</sup> | T <sub>m</sub><br>(°C) | T <sub>g</sub><br>(°C) | HOMO(eV) | LUMO<br>(eV) | E <sub>g</sub><br>(eV) | Ref. |
|-----------|--------------------------------|-------------------------------------|------------------------|------------------------|----------|--------------|------------------------|------|
| 8         | 414 <sup>b</sup>               | ---                                 | ---                    | ---                    | 5.84     | 2.89         | 2.95                   | 9    |
| 9         | 421 <sup>b</sup>               | ---                                 | ---                    | ---                    | 5.78     | 2.82         | 2.96                   | 9    |
| 10        | 420 <sup>b</sup>               | ---                                 | ---                    | ---                    | 5.96     | 2.99         | 2.97                   | 9    |
| 11        | 427 <sup>b</sup>               | ---                                 | ---                    | ---                    | 6.67     | 2.70         | 2.97                   | 9    |
| 12        | 410                            | 300                                 | ---                    | ---                    | 5.96     | 2.84         | 3.12                   | 10   |
| 13        | 430 <sup>b</sup>               | ---                                 | ---                    | ---                    | 5.88     | 2.87         | 3.01                   | 9    |
| 14        | 454 <sup>c</sup>               | ---                                 | ---                    | ---                    | 5.8      | 2.8          | 3.0                    | 11b  |
| 16        | 431                            | 397                                 | 255                    | 120                    | 5.5      | 2.5          | 3.0                    | 13   |
| 19        | 416, 434                       | 510                                 | ---                    | ---                    | 5.57     | 2.59         | 2.98                   | 14   |
| 20        | 430                            | 535                                 | ---                    | ---                    | 5.55     | 2.58         | 2.97                   | 14   |
| 21        | 414, 432                       | 542                                 | ---                    | ---                    | 5.61     | 2.61         | 3.00                   | 14   |
| 22        | 422, 440                       | 539                                 | ---                    | ---                    | 5.59     | 2.60         | 2.99                   | 14   |
| 23        | 421                            | ---                                 | 288                    | 116                    | 5.50     | 2.48         | 3.02                   | 15   |
| 24        | 416                            | ---                                 | 294                    | 125                    | 5.50     | 2.48         | 3.02                   | 15   |
| 25        | 417                            | ---                                 | 164                    | 84                     | 5.49     | 2.46         | 3.03                   | 15   |
| 26        | 420                            | ---                                 | 219                    | 123                    | 5.49     | 2.48         | 3.01                   | 15   |
| 27        | 421                            | ---                                 | 242                    | 126                    | 5.50     | 2.50         | 3.00                   | 15   |
| 28        | 425                            | ---                                 | 292                    | 153                    | 5.48     | 2.48         | 3.00                   | 15   |
| 30        | 440                            | 419                                 | 294                    | 133                    | 5.83     | 2.95         | 2.88                   | 16b  |
| 31        | 435                            | 324                                 | ---                    | ---                    | 5.83     | 2.87         | ---                    | 16c  |
| 32        | 419, 437                       | 392                                 | ---                    | ---                    | 5.85     | 2.91         | ---                    | 16c  |

---

|    |                  |                  |       |       |      |      |      |     |
|----|------------------|------------------|-------|-------|------|------|------|-----|
| 33 | 433 <sup>d</sup> | 410              | 366   | 2.96  | 5.55 | 2.59 | 2.96 | 17a |
| 34 | 433 <sup>d</sup> | 464              | 310   | 2.95  | 5.53 | 2.58 | 2.95 | 17a |
| 35 | 436 <sup>d</sup> | 470              | 340   | 2.94  | 5.54 | 2.60 | 2.94 | 17a |
| 36 | 416, 436         | 410              | ---   | 206   | 6.03 | 2.92 | 2.96 | 17c |
| 37 | 415, 436         | 410 <sup>h</sup> | 391   | 207   | 5.91 | 2.89 | ---  | 17d |
| 38 | 421, 433         | 441              | 298   | 138   | 5.58 | 2.53 | 3.05 | 18  |
| 39 | 425              | 400              | 262   | 132   | 5.55 | 2.51 | 3.04 | 18  |
| 40 | 432              | 401.8            | 236.5 | 132.5 | 5.58 | 2.60 | 2.98 | 13  |
| 41 | 431              | 412.1            | 265.2 | 133.8 | 5.58 | 2.60 | 2.98 | 13  |
| 42 | 437              | 458              | ---   | ---   | 5.55 | 2.57 | 2.98 | 20  |
| 43 | 435              | 480              | ---   | ---   | 5.55 | 2.57 | 2.98 | 20  |
| 44 | 435              | 504              | ---   | ---   | 5.58 | 2.61 | 2.97 | 20  |
| 45 | 435              | 525              | ---   | ---   | 5.57 | 2.61 | 2.96 | 20  |
| 46 | 414, 425         | 358              | 320   | ---   | 5.22 | 2.10 | ---  | 21  |
| 47 | 415              | 367              | 333   | ---   | 5.21 | 2.18 | ---  | 21  |
| 48 | 403, 422         | 323              | 275   | ---   | 5.23 | 2.11 | ---  | 21  |
| 49 | 409, 425         | 397              | 283   | ---   | 5.25 | 2.15 | ---  | 21  |
| 50 | 426              | 429              | 350   | ---   | 5.28 | 2.28 | ---  | 21  |
| 51 | 439              | 449              | 389   | ---   | 5.26 | 2.28 | ---  | 21  |
| 52 | 438              | 410              | ---   | ---   | 5.91 | 3.05 | 2.96 | 23  |
| 53 | 448 <sup>e</sup> | 445              | 298   | 155   | 5.7  | 2.9  |      | 24  |
| 54 | 482              | 381.5            | 290.0 | 135.6 | 5.63 | 2.61 | 3.02 | 25a |
| 55 | 495              | 356.3            | 345.0 | 155.3 | 5.65 | 2.62 | 3.03 | 25a |
| 56 | 451              | 401.7            | 337.0 | ---   | 5.62 | 2.67 | 2.95 | 25a |
| 57 | 462              | 408.4            | 398.0 | ---   | 5.59 | 2.64 | 2.95 | 25a |
| 58 | 441              | ---              | 406   | ---   | 5.69 | 2.76 | 2.93 | 26  |
| 59 | 442              | 353              | 283   | ---   | 5.79 | 2.92 | 2.87 | 16b |
| 60 | 442              | 429              | 388   | 165   | 5.82 | 2.88 | 2.94 | 16b |
| 61 | 438              | 358              | ---   | 131   | 5.6  | 2.7  | 2.9  | 28  |
| 62 | 438              | ---              | ---   | ---   | 5.54 | 2.68 | ---  | 30  |
| 63 | 402, 423         | 441              | 417   | 159   | 5.59 | 2.59 | 3.03 | 31  |
| 64 | 416, 431         | 488              | 438   | 241   | 5.55 | 2.54 | 3.02 | 31  |
| 65 | 414, 433         | 495              | 475   | 257   | 5.55 | 2.55 | 3.02 | 31  |
| 66 | 446              | 510              | 391   | 227   | 5.85 | 3.92 | ---  | 16a |
| 67 | ---              | ---              | ---   | ---   | ---  | ---  | ---  |     |
| 69 | 425 <sup>f</sup> | 450              | 397   | 223   | 5.47 | 2.45 | 3.02 | 35  |
| 72 | 425 <sup>e</sup> | ---              | 220   | 174.1 | 5.83 | 2.79 | 3.04 | 37b |

---

|     |                       |      |     |       |      |      |      |     |
|-----|-----------------------|------|-----|-------|------|------|------|-----|
| 73  | 432 <sup>e</sup>      | ---  | 350 | 282.4 | 5.80 | 2.78 | 3.02 | 37a |
| 74  | 428 <sup>d</sup>      | 393  | 351 | 252   | 5.87 | 2.91 | ---  | 37c |
| 75  | 426 <sup>d</sup>      | 413  | 339 | 261   | 5.89 | 2.93 | ---  | 37c |
| 76  | 432 <sup>d</sup>      | 435  | 381 | 250   | 5.84 | 2.89 | ---  | 37c |
| 78  | 450 <sup>e</sup>      | 389  | 304 | 204   | 5.94 | 3.09 | ---  | 40  |
| 79  | 453 <sup>e</sup>      | 439  | 350 | 237   | 5.87 | 3.03 | ---  | 40  |
| 80  | 457                   | 320  | --- | ---   | 5.65 | 2.87 | 2.78 | 41  |
| 81  | 470                   | >400 | --- | 162   | 5.8  | 2.91 | 2.89 | 41  |
| 82  | 520                   | >400 | --- | ---   | 5.22 | 2.9  | 2.32 | 41  |
| 83  | 431 <sup>d</sup>      | 382  | 292 | ---   | 5.58 | 2.60 | 2.98 | 38  |
| 84  | 435 <sup>d</sup>      | 386  | --- | 132   | 5.59 | 2.68 | 2.91 | 38  |
| 85  | 441, 463              | 340  | --- | 251   | 5.61 | 2.73 | 2.88 | 42  |
| 86  | 441, 463              | 358  | --- | 248   | 5.63 | 2.77 | 2.86 | 42  |
| 87  | 453, 475              | 300  | --- | 194   | 5.70 | 2.89 | 2.81 | 42  |
| 98  | 442 <sup>d</sup>      | 430  | --- | 168   | 6.17 | 3.09 | 3.04 | 23  |
| 99  | 400, 422 <sup>f</sup> | 401  | 216 | 102   | 5.85 | 2.75 | ---  | 46  |
| 100 | 413 <sup>f</sup>      | 442  | 252 | 148   | 5.91 | 2.89 | ---  | 46  |
| 101 | 421 <sup>f</sup>      | 486  | 282 | 177   | 5.90 | 2.90 | ---  | 46  |
| 102 | 426                   | 368  | --- | 140   | 5.86 | 2.84 | 3.02 | 43  |
| 103 | 438                   | 490  | --- | 94    | 5.83 | 2.89 | 2.94 | 43  |
| 104 | 430                   | 440  | --- | 141   | 5.65 | 2.77 | 2.88 | 43  |
| 105 | 420                   | 358  | --- | 89    | 5.90 | 2.95 | 2.95 | 43  |
| 106 | 472                   | 410  | 255 | 142   | 5.25 | 2.38 | ---  | 48  |
| 107 | 466                   | 405  | 353 | 170   | 5.18 | 2.33 | ---  | 48  |
| 108 | 470                   | 415  | 393 | 201   | 5.16 | 2.33 | ---  | 48  |
| 109 | 467                   | 400  |     | 140   | 5.57 | 2.60 | ---  | 48  |
| 110 | 450                   | 410  | 264 | 157   | 5.31 | 2.38 | ---  | 48  |
| 111 | 467                   | 405  | 375 | 138   | 5.21 | 2.34 | ---  | 48  |
| 113 | 498                   | ---  | --- | ---   | 5.50 | 2.67 | 2.83 | 49  |
| 114 | 489                   | ---  | --- | ---   | 5.46 | 2.60 | 2.86 | 49  |
| 115 | 492                   | ---  | --- | ---   | 5.54 | 2.58 | 2.96 | 49  |
| 116 | 454 <sup>f</sup>      | 420  | 351 | ---   | 5.22 | 2.33 | 2.89 | 50  |
| 117 | 438                   | ---  | --- | 104   | 5.70 | 2.94 | ---  | 52a |
| 118 | 439                   | ---  | --- | 129   | 5.66 | 2.91 | ---  | 52a |
| 119 | 444                   | ---  | --- | 162   | 5.63 | 2.93 | ---  | 52a |
| 120 | 474 <sup>d</sup>      | 427  | 305 | 130   | 5.35 | 2.48 | 2.87 | 17b |
| 121 | 476                   | 479  | 272 | 139   | 5.37 | 2.50 | 2.87 | 17b |

---

|     |                       |     |     |     |      |      |      |     |
|-----|-----------------------|-----|-----|-----|------|------|------|-----|
| 124 | 431 <sup>d</sup>      | 388 | 274 | 135 | 5.58 | 2.66 | 2.88 | 51  |
| 125 | 524                   | --- | 373 | 227 | 5.54 | 3.11 | ---  | 53a |
| 126 | 536                   | --- | 332 | 223 | 5.54 | 3.11 | ---  | 53a |
| 127 | 526                   | --- | 248 | 169 | 5.51 | 3.05 | ---  | 53a |
| 128 | 524                   | --- | --- | --- | 5.57 | 3.11 | 2.46 | 53b |
| 129 | 530                   | --- | --- | --- | 5.49 | 3.05 | 2.44 | 53b |
| 130 | 546                   | --- | --- | --- | 5.45 | 3.06 | 2.39 | 53b |
| 131 | 553                   | --- | --- | --- | 5.37 | 3.01 | 2.36 | 53b |
| 132 | 560,579               | --- | --- | --- | 5.2  | 2.8  | ---  | 54  |
| 133 | 443                   | 300 | --- | --- | 5.4  | 2.36 | 3.04 | 55  |
| 134 | 441                   | 395 | --- | --- | 5.41 | 2.37 | 3.04 | 55  |
| 135 | 431                   | 419 | --- | --- | 5.50 | 2.45 | 3.05 | 55  |
| 136 | 435                   | 326 | 196 | 89  | 5.47 | 2.42 | 3.05 | 55  |
| 137 | 427                   | --- | --- | 214 | 5.54 | 2.54 | ---  | 56  |
| 138 | 428                   | --- | --- | 187 | 5.56 | 2.57 | ---  | 56  |
| 139 | 418, 436              | 411 | --- | 177 | 5.50 | 2.55 | ---  | 57  |
| 140 | 410, 430              | 437 | --- | 115 | 5.67 | 2.64 | ---  | 57  |
| 141 | 414, 434              | 454 | --- | 149 | 5.61 | 2.61 | ---  | 57  |
| 143 | 438                   | 502 | 355 | 192 | 6.02 | 3.07 | ---  | 16a |
| 144 | 512 <sup>d</sup>      | 461 | 276 | 97  | 5.92 | 3.19 | ---  | 59  |
| 145 | 514 <sup>d</sup>      | 400 | 288 | 106 | 6.02 | 3.11 | ---  | 59  |
| 146 | 512 <sup>d</sup>      | 445 | 228 | 83  | 6.00 | 3.16 | ---  | 59  |
| 147 | 518 <sup>d</sup>      | 430 | 262 | 108 | 6.04 | 3.10 | ---  | 59  |
| 148 | 518 <sup>d</sup>      | 457 | 296 | 131 | 6.03 | 3.13 | ---  | 59  |
| 149 | 517 <sup>d</sup>      | 458 | 180 | 52  | 5.97 | 3.15 | ---  | 59  |
| 150 | 456 <sup>d</sup>      | 460 | --- | --- | 6.67 | 3.71 | 2.96 | 60  |
| 151 | 447 <sup>d</sup>      | 418 | --- | --- | 6.72 | 3.7  | 3.00 | 60  |
| 152 | 447 <sup>d</sup>      | 420 | --- | --- | 6.66 | 3.68 | 2.98 | 60  |
| 153 | 430 <sup>d</sup>      | 430 | --- | --- | 6.75 | 3.7  | 3.05 | 60  |
| 154 | 421 <sup>d</sup>      | 410 | --- | 92  | 6.83 | 3.71 | 3.12 | 60  |
| 157 | 435                   | 460 | --- | 146 | 5.60 | 2.50 | ---  | 62  |
| 158 | 456                   | --- | --- | --- | 5.65 | 2.65 | ---  | 63  |
| 159 | 503                   | --- | --- | --- | 5.71 | 2.76 | ---  | 63  |
| 160 | ---                   | 442 | 268 | 97  | 5.9  | 2.8  | 3.1  | 64  |
| 161 | 415, 431 <sup>f</sup> | 471 | --- | 226 | 5.51 | 2.47 | ---  | 66a |
| 162 | 433 <sup>f</sup>      | 475 | --- | 154 | 5.38 | 2.48 | ---  | 66a |
| 163 | 430 <sup>f</sup>      | 466 | --- | 173 | 5.32 | 2.24 | ---  | 66a |

---

|     |                  |       |       |       |      |      |      |     |
|-----|------------------|-------|-------|-------|------|------|------|-----|
| 164 | 433 <sup>f</sup> | 474   | ---   | 180   | 5.27 | 2.36 | ---  | 66a |
| 165 | 438 <sup>f</sup> | ---   | 378   | 165   | 5.30 | 2.40 | ---  | 66b |
| 166 | 434 <sup>f</sup> | ---   | 376   | 229   | 5.46 | 2.45 | ---  | 66b |
| 167 | 442 <sup>f</sup> | ---   | ---   | 189   | 5.45 | 2.46 | ---  | 66b |
| 168 | 441 <sup>f</sup> | ---   | ---   | ---   | 5.48 | 2.53 | ---  | 66b |
| 169 | 496              | 460.4 | 310.6 | 144.1 | 5.33 | 2.40 | 2.93 | 7   |
| 170 | 496              | 481.0 | 349.8 | 152.7 | 5.29 | 2.32 | 2.97 | 7   |
| 171 | 493              | 486.0 | 276.1 | 161.5 | 5.33 | 2.41 | 2.92 | 7   |
| 172 | 498              | 519.7 | 398.8 | ---   | 5.28 | 2.32 | 2.96 | 7   |
| 175 | 474 <sup>f</sup> | ---   | ---   | 223   | 5.00 | 2.41 | ---  | 68  |
| 176 | 436              | 484   | ---   | 166   | 5.57 | 2.65 | 2.92 | 69  |
| 177 | 436              | 504   | ---   | 189   | 5.54 | 2.59 | 2.95 | 69  |
| 178 | 436              | 497   | ---   | 260   | 5.52 | 2.58 | 2.94 | 69  |
| 179 | 437              | 427   | ---   | 231   | 5.50 | 2.57 | 2.93 | 69  |

<sup>a</sup> Obtained in CH<sub>2</sub>Cl<sub>2</sub> solution. <sup>b</sup> Obtained in 1,2-dichloroethane solution. <sup>c</sup> Obtained in the film. <sup>d</sup> Obtained in the chloroform. <sup>e</sup> Obtained in the THF. <sup>f</sup> Obtained in the toluene. <sup>g</sup> 5% weight loss. <sup>h</sup> 3% weight loss.

## References

- C. W. Tang and S. A. Van Slyke, *Appl. Phys. Lett.*, 1987, **51**, 913.
- (a) L. S. Huang and C. H. Chen, *Mater. Sci. Eng.*, 2002, **39**, 143; (b) C. W. Tang, S. A. VanSlyke and C. H. Chen, *J. Appl. Phys.*, 1989, **65**, 3610; (c) J. H. Burroughes, D. D. C. Bradley, A. R. Brown, R. N. Marks, K. Mackay, R. H. Friend, P. L. Burn and A. B. Homes, *Nature*, 1990, **347**, 539; (d) M. A. Baldo, D. F. O'Brien, Y. You, A. Shoustikov, S. Sibley, M. E. Thompson and S. R. Forrest, *Nature*, 1998, **395**, 151; (e) W.-Y. Wong and C.-L. Ho, *J. Mater. Chem.*, 2009, **19**, 4457; (f) S. Chen, L. Deng, J. Xie, L. Peng, L. Xie, Q. Fan and W. Huang, *Adv. Mater.*, 2010, **22**, 5227; (g) K. Walzer, B. Maennig, M. Pfeiffer and K. Leo, *Chem. Rev.*, 2007, **107**, 1233; (h) B. W. D'Andrade and S. R. Forrest, *Adv. Mater.*, 2004, **16**, 1585.
- M. Thelakkat, *Macromol. Mater. Eng.*, 2002, **287**, 442.
- S. W. Culligan, Y. Geng, S. H. Chen, K. Klubek, K. M. Vaeth and C. W. Tang, *Adv. Mater.*, 2003, **15**, 1176.
- K. Bruener, A. Dijken, H. Börner, J. J. A. M. Bastiaansen, N. M. M. Kiggen and B. M. W. Langeveld, *J. Am. Chem. Soc.*, 2004, **126**, 6035.
- M. Pope, H. Kallmaon and P. Magnance, *J. Chem. Phys.*, 1963, **38**, 2042.
- J. Huang, J.-H. Su, X. Li, M.-K. Lam, K.-M. Fuang, H.-H. Fan, K.-W. Cheah, C. H. Chen and H. Tian, *J. Mater. Chem.*, 2011, **21**, 2957.
- C. Adachi, T. Tsutsui and S. Saito, *Appl. Phys. Lett.*, 1990, **58**, 799.
- B. Balaganesan, W.-J. Shen and C. H. Chen, *Tetrahedron Lett.*, 2003, **44**, 5747.
- K. H. So, H.-T. Park, S. C. Shin, S.-G. Lee, D. H. Lee, K.-H. Lee, H.-Y. Oh, S.-K. Kwon and Y.-H. Kim, *Bull. Korean Chem. Soc.*, 2009, **30**, 1611.
- (a) J. Shi and C. W. Tang, *Appl. Phys. Lett.*, 2002, **80**, 3201; (b) Y. Kan, L. Wang, Y. Gao, L. Duan, G. Wu and Y. Qiu, *Synth. Met.*, 2004, **141**, 245; (c) Y. Kan, L. Wang, L. Duan, Y. Hu, G. Wu and Y. Qiu, *Appl. Phys. Lett.*, 2004, **84**, 1513; (d) M.-T. Lee, Y.-S. Wu, H.-H. Chen, C.-H. Tsai, L.-C. Liao, C. H. Chen, *Proceedings of the Society For Information Display*, Seattle, Washington, 23-28 May 2004; (e) M.-T. Lee, H.-H. Chen, C.-H. Liao, C.-H. Tsai and C. H. Chen, *Appl. Phys. Lett.*, 2004, **85**, 3301; (f) M.-T. Lee, H.-H. Chen, C.-H. Liao, C.-H. Tsai and C. H. Chen, *Adv. Mater.*, 2005, **17**, 2493; (g) M.-H. Ho, Y.-S. Wu, S.-W. Wen, M.-T. Lee, T.-M. Chen, C. H. Chen, K.-C. Kwok, S.-K. So, K.-T. Yeung, Y.-K. Cheng and Z.-Q. Gao, *Appl. Phys. Lett.*, 2006, **89**, 252903; (h) M.-H. Ho, M.-T. Hsieh, K.-H. Lin, T.-M. Chen, J.-F. Chen and C. H. Chen, *Appl. Phys. Lett.*, 2009, **94**, 023306; (i) Z. Q. Gao, B. X. Mi, C. H. Chen, K. W. Cheah, Y. K. Cheng and W.-S. Wen, *Appl. Phys. Lett.*, 2007, **90**, 123506.
- (a) Y. Z. Su, J. T. Lin, Y.-T. Tao, C.-W. Ko, S.-C. Lin and S.-S. Sun, *Chem. Mater.*, 2002, **14**, 1884; (b) B. E. Koene, D. E. Loy and M. E. Thompson, *Chem. Mater.*, 1998, **10**, 2235.
- J. Huang, B. Xu, M.-K. Lam, K.-W. Cheah, C. H. Chen and J.-H. Su, *Dyes and Pigments*, 2011, **89**, 155.
- L. Wang, W.-Y., Wong, M.-F. Lin, W.-K. Wong, K.-W. Cheah, H.-L. Tam and C. H. Chen., *J. Mater. Chem.*, 2008, **18**, 4529.
- K.-R. Wee, W.-S. Han, J.-E. Kim, A.-L. Kim, S. Kwon and S. O. Kang, *J. Mater. Chem.*, 2011, **21**, 1115.
- (a) C.-H. Wu, C.-H. Chien, F.-M. Hsu, P.-I. Shih and C.-F. Shu, *J. Mater. Chem.*, 2009, **19**, 1464; (b) C.-J. Zheng, W.-M. Zhao, Z.-Q. Wang, D. Wang, J. Ye, X.-M. Ou, X.-H. Zhang, C.-S. Lee and S.-T. Lee, *J. Mater. Chem.*, 2010, **20**, 1560; (c) S. Tao, S. Xu, X. Zhang, *Chem. Phys. Lett.*, 2006, **429**, 622.
- (a) S.-K. Kim, B. Yang, Y. Ma, J.-Y. Lee and J. Park, *J. Mater. Chem.*, 2008, **18**, 3376; (b) S.-K. Kim, B. Yang, Y.-I. Park, Y. Ma, J.-Y. Lee, H.-J. Kim and J. Park, *Org. Electron.*, 2009, **10**, 822; (c) J.-W. Park, Y.-H., Kim, S.-Y. Jung, K.-N. Byeon, S.-H. Jang, S.-K. Lee, S. C. Shin and S.-K. Kwon., *Thin Solid Films*, 2008, **516**, 8381; (d) Z. Q. Wang, C. J. Zheng, H. Liu, X. M. Ou and X. H. Zhang, *Sci. China. Chem.*, 2011, **54**, 666.

- 18 Z.-Y. Xia, Z.-Y. Zhang, J.-H. Su, Q. Zhang, K.-M. Fung, M.-K. Lam, K.-F. Li, W.-Y. Wong, K.-W. Cheah, H. Tan and C. H. Chen, *J. Mater. Chem.*, 2010, **20**, 3768.
- 19 (a) B. Gomez-Lor, O. Defrutos, P. A. Ceballos, T. Granier and A. M. Echavarren, *Eur. J. Org. Chem.*, 2001, **11**, 2107; (b) M.-S. Yuan, Z.-Q. Liu and Q. Fang, *J. Org. Chem.*, 2007, **72**, 7915.
- 20 J. Huang, B. Xu, J.-H. Su, C. H. Chen and H. Tian, *Tetrahedron*, 2010, **66**, 7577.
- 21 Z.Y. Xia, J.-H. Su, W.-Y. Wong, K.-W. Cheah, H. Tian and C. H. Chen, *J. Mater. Chem.*, 2010, **20**, 8382.
- 22 S. W. Wen, M. T. Lee and C. H. Chen, *J. Display Tech.*, 2005, **1**, 90.
- 23 Y.-H. Kim, H.-C. Jeong, S.-H. Kim, K. Yang and S.-K. Kwon, *Adv. Funct. Mater.*, 2005, **15**, 1799.
- 24 P.-I. Shih, C.-Y. Chuang, C.-H. Chien, E. W.-G. Diau and C.-F. Shu, *Adv. Funct. Mater.*, 2007, **17**, 3141.
- 25 (a) S.-K. Kim, Y.-I Park, I.-N. Kang and J.-W. Park, *J. Mater. Chem.*, 2007, **17**, 4670; (b) S.-K. Kim, S.-Y. Oh and J.-W. Park, *Thin Solid Films*, 2008, **517**, 1349.
- 26 J.-Y. Park, S. Y. Jung, J. Y. Lee and Y. G. Baek, *Thin Solid Films*, 2008, **516**, 2917.
- 27 S. W. Culligan, A. C.-A. Chen, J. U. Wallace, K. P. Klubek, C. W. Tang and S. H. Chen, *Adv. Funct. Mater.*, 2006, **16**, 1481.
- 28 H. Park, D. Oh, J.-W. Park, J.-H. Kim, S.-C. Shin, Y.-H. Kim and S.-K. Kwon, *Bull. Korean Chem. Soc.*, 2010, **31**, 1951.
- 29 C.-C. Wu, T.-L. Liu, W.-Y. Hung, Y.-T. Lin, K.-T. Wong, R.-T. Chen, Y.-M. Chen and Y.-Y. Chien, *J. Am. Chem. Soc.*, 2003, **125**, 3710.
- 30 L.-L. Xu, L.-Q. Zhao, X.-Q. Zhang, G. Zhou, J.-S. Chen, Y.-X. Cheng, Y.-H. Geng, D.-G. Ma and L.-X. Wang, *Chin. J. Appl. Chem.*, 2005, **22**, 114.
- 31 S. Ye, J. Chen, C. Di, Y. Liu, K. Lu, W. Wu, C. Du, Y. Liu, Z. Shuai and G. Yu, *J. Mater. Chem.*, 2010, **20**, 3186.
- 32 (a) T. P. I. Saragi, T. Spehr, A. Siebert, T. Fuhrmann-Lieker and J. Salbeck, *Chem. Rev.*, 2007, **107**, 1011; (b) J. Y. Shen, C. Y. Lee, T.-H. Huang, J. T. Lin, Y.-T. Tao, C.-H. Chien and C. Tsai, *J. Mater. Chem.*, 2005, **15**, 2455.
- 33 Y. H. Kim, D. C. Shin, S. H. Kim, C. H. Ko, H. S. Yu, Y. S. Chae and S. K. Kwon, *Adv. Mater.*, 2001, **13**, 1690.
- 34 D. Gebeyehu, K. Walzer, G. He, M. Pfeiffer, K. Leo, J. Brandt, A. Gerhard, P. Stöbel and H. Vestweber, *Synth. Met.*, 2005, **148**, 205.
- 35 W.-J. Shen, R. Dodda, C.-C. Wu, F.-I. Wu, T.-H. Liu, H.-H. Chen, C. H. Chen and C.-F. Shu, *Chem. Mater.*, 2004, **16**, 930.
- 36 S. E. Jang, C. W. Joo, K. S. Yook, J.-W. Kim, C.-W. Lee and J. Y. Lee, *Synth. Met.*, 2010, **160**, 1184.
- 37 (a) K.-S. Kim, Y.-M., Jeon, J.-W. Kim, C.-W. Lee and M.-S. Gong, *Org. Electron.*, 2008, **9**, 797; (b) K.-S. Kim, Y.-M. Jeon, H.-S. Lee, J.-W. Kim, C.-W. Lee, J.-G. Jang and M.-S. Gong, *Synth. Met.*, 2008, **158**, 870; (c) M.-S. Gong, H.-S. Lee and Y.-M. Jeon, *J. Mater. Chem.*, 2010, **20**, 10735.
- 38 M.-G. Shin, S. O. Kim, H. T. Park, S. J. Park, H. S. Yu, Y.-H. Kim and S.-K. Kwon, *Dyes and Pigments*, 2012, **92**, 1075.
- 39 K. Okumoto, H. Kanno, Y. Hamada, H. Takahashi and K. Shibata, *Appl. Phys. Lett.*, 2006, **89**, 063504.
- 40 D.-H. Kim, D. H. Choi, J. J. Park, S. T. Lee and J. H. Kwon, *Chem. Lett.*, 2008, **37**, 1150.
- 41 W. J. Jo, K.-H. Kim, H. C. No, D.-Y. Shin, S.-J. Oh, J.-H. Son, Y.-H. Kim, Y.-K. Cho, Q.-H. Kim, Y.-K. Cho, Q.-H. Zhao, K.-H. Lee, H.-Y. Oh and S.-K. Kwon, *Synth. Met.*, 2009, **159**, 1359.
- 42 S.-H. Lin, F.-I. Wu, H.-Y. Tsai, P.-Y. Chou, H.-H. Chou, C.-H. Cheng and R.-S. Liu, *J. Mater. Chem.*, 2011, **21**, 8122.
- 43 K. H. Lee, J. K. Park, J. H. Seo, S. W. Park, Y. S. Kim, Y. K. Kim and S. S. Yoo, *J. Mater. Chem.*, 2011, **21**, 13640.
- 44 C. A. Landis, S. R. Parkin and J. E. Anthony, *Japan. J. Appl. Phys.*, 2005, **44**, 3921.
- 45 T. Karatsu, R. Hazuku, M. Asuke, A. Nishigaki, S. Yagai, Y. Suzuri, H. Kita and A. Kitamura, *Org. Electron.*, 2007, **8**, 357.
- 46 Y.-Y. Lyu, J. Kwak, O. Kwon, S.-H. Lee, D. Kim, C. Lee and K. Char, *Adv. Mater.*, 2008, **20**, 2720.
- 47 Z. Ning and H. Tian, *Chem. Commun.*, 2009, 5483.
- 48 K. Danel, T.-H. Huang, J. T. Lin, Y. -T. Tao and C.-H. Chuen, *Chem. Mater.*, 2002, **14**, 3860.
- 49 K. H. Lee, J. N. You, S. Kang, J. Y. Lee, H. J. Kwon, Y. K. Kim and S. S. Yoon, *Thin Solid Films*, 2010, **518**, 6253.
- 50 J.-W. Park, P. Kang, H. Park, H.-Y. Oh, J.-H. Yang, Y.-H. Kim and S.-K. Kwon, *Dyes and Pigments*, 2010, **85**, 93.
- 51 I. Kang, J.-Y. Back, R. Kim, Y.-H. Kim and S.-K. Kwon, *Dyes and Pigments*, 2011, **92**, 588.
- 52 (a) S. Tao, Y. Zhou, C.-S. Lee, S.-T. Lee, D. Huang and X. Zhang, *J. Phys. Chem. C*, 2008, **112**, 14603; (b) K. H. Lee, J. N. You, H. J. Kwon, Y. K. Kim and S. S. Yoon, *Mol. Cryst. Liq. Cryst.*, 2010, **530**, 48; (c) A. Thangthong, D. Meunmart, N. Prachumrak, S. Jungsuttiwong, T. Keawin, E. Sudyoadsuk and V. Promarak, *Chem. Commun.*, 2011, **47**, 7122.
- 53 (a) M.-X. Yu, J.-P. Duan, C.-H. Lin, C.-H. Cheng and Y.-T. Tao, *Chem. Mater.*, 2002, **14**, 3958; (b) Y.-H. Yu, C.-H. Huang, J.-M. Yeh and P.-T. Huang, *Org. Electron.*, 2011, **12**, 694.
- 54 B. M. Seo, J. H. Seo, J. H. Kim, J. S. Park, K. H. Lee, M. H. Park, S. S. Yoon and Y. K. Kim, *Thin Solid Films*, 2010, **518**, 6214.
- 55 S. H. Kim, I. Cho, M. K. Sim, S. Park and S. Y. Park, *J. Mater. Chem.*, 2011, **21**, 9139.
- 56 L. Zhao, J. Zhou, J. Huang, C. Li, Y. Zhang, C. Sun, X. Zhu, J. Peng, Y. Cao and J. Roncali, *Org. Electron.*, 2008, **9**, 649.
- 57 L. Wang, Z.-Y. Wu, W.-Y. Wong, K.-W. Cheah, H. Huang and C. H. Chen, *Org. Electron.*, 2011, **12**, 595.
- 58 K. Okumoto, H. Kanno, Y. Hamada, H. Takahashi and K. Shibata, *Appl. Phys. Lett.*, 2006, **89**, 013502.
- 59 M.A. Reddy, A. Thomas, K. Srinivas, V. J. Rao, K. Bhanuprakash, B. Sridhar, A. Kumar, M. N. Kamalasanan and R. Srivastava, *J. Mater. Chem.*, 2009, **19**, 6172.
- 60 M. A. Reddy, G. Malleshm, A. Thomas, K. Srinivas, V. J. Rao, K. Bhanuprakash, L. Giribabu, R. Grover, A. Kumar, M. N. Kamalasanan and R. Srivastava, *Synth. Met.*, 2011, **161**, 869.
- 61 Y. -I. Park, J.-H. Son, J.-S. Kang, S.-K. Kim, J.-H. Lee and J.-W. Park, *Chem. Commun.*, 2008, 2143.
- 62 C.-H. Chien, C.-K. Chen, F.-M. Hsu, C.-F. Shu, P.-T. Chou and C.-H. Lai, *Adv. Funct. Mater.*, 2009, **19**, 560.
- 63 J.-F. Lee, Y.-C. Chen, J.-T. Lin, C.-C. Wu, C.-Y. Chen, C.-A. Dai, C.-Y. Chao, H.-L. Chen and W.-B. Liao, *Tetrahedron*, 2011, **67**, 1696.
- 64 Y. Sun, L. Duan, D. Zhang, J. Qiao, G. Dong, L. Wang and Y. Qiu, *Adv. Funct. Mater.*, 2011, **21**, 1881.
- 65 (a) A. Chaskar, H.-F. Chen and K.-T. Wang, *Adv. Mater.*, 2011, **23**, 3876; (b) L. Duan, J. Qiao, Y. Sun and Y. Qiu, *Adv. Mater.*, 2011, **23**, 1137.
- 66 (a) M. Zhu, Q. Wang, Y. Gu, X. Cao, C. Zhong, D. Ma, J. Qin and C. Yang, *J. Mater. Chem.*, 2011, **21**, 6409; (b) M. Zhu, T. Ye, C.-G. Li, X. Cao, C. Zhong, D. Ma, J. Qin and C. Yang, *J. Phys. Chem. C*, 2011, **115**, 17965.
- 67 C. K. Kim, E. S. Song, H. J. Kim, C. Park, J. K. Kim, Y. C. Kim, J. W. Yu and C. Kim, *J. Polym. Sci.: Part A: Polym. Chem.*, 2006, **44**, 5855.
- 68 J. Sun, H. Zhong, E. Xu, D. Zeng, J. Zhang, H. Xu, W. Zhu and Q. Fang, *Org. Electron.*, 2010, **11**, 74.
- 69 H. Huang, Q. Fu, S. Zhuang, G. Mu, L. Wang, J. Chen, D. Ma and C. Yang, *Org. Electron.*, 2011, **12**, 1716.
